# Supplementary material for: Mismatch Repair Protein Msh6Tt Is Necessary for Nuclear Division and Gametogenesis in Tetrahymena thermophila
Source: MDPI journal article supplement (doi:10.3390/ijms242417619), 2023-12-18
Supplement: s1 [file s1]

Figure S1. Western blotting analysis using whole cell lysates prepared from two different mating type *Tetrahymena* cells expressing Msh6<sup>Tt</sup>-3HA. Lane 1 indicates untagged wild type mating cells; Lanes 2-4 indicate after equal volumes of Msh6<sup>Tt</sup>-3HA-B2086 and Msh6<sup>Tt</sup>-3HA-CU428 mutants were mixed, samples were collected at 5, 6, and 8 hours.

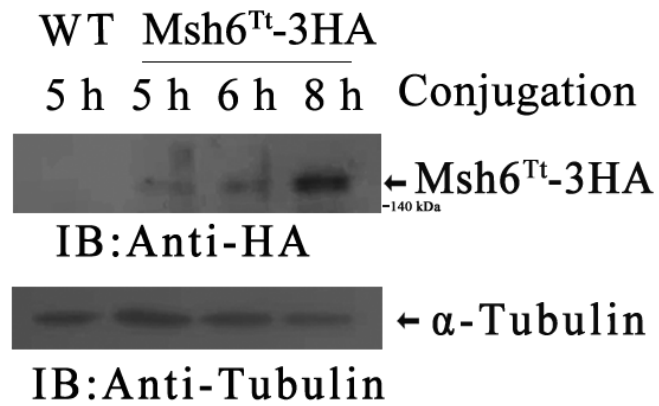

Figure S2. qRT-PCR was used to detect the relative expression levels of *MSH6<sup>Tt</sup>* at different growth stages of *Tetrahymena* in wild-type cells and *MSH6<sup>Tt</sup>KO* mutants. L, vegetative growing cells; equal volumes of B2086 and CU428 cells were mixed, and samples were collected at 2 h, 8 h and 16 h after mixing, referred to as C-2, C-8 and C-16. The Y-axis indicates the relative normalized expression of *MSH6<sup>Tt</sup>*. The control was the gene expression level of *MSH6<sup>Tt</sup>* in wild-type vegetative growing cells. Error bars represent the standard deviations for three replicates.

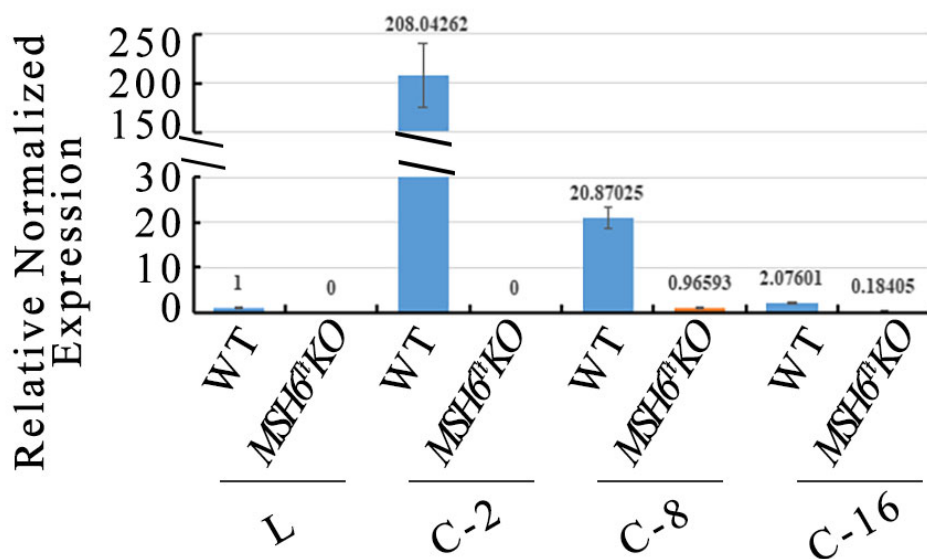

Figure S3. Knocking out *MSH6<sup>Tt</sup>* resulted in abnormal nuclear division during vegetative proliferation in *Tetrahymena*. (A) a, Division index of *MSH6<sup>Tt</sup>KO* cells and wild-type cells after five cycles of temperature gradient followed by 55-70 min; b, Nuclear development statistics of the nuclear division of the *MSH6<sup>Tt</sup>KO* mutant cell line and wild-type control cells after synchronization during vegetative proliferation. The grey bars indicate the proportion of *MSH6<sup>Tt</sup>KO* cells with abnormal nuclear divisions. The total number of cells counted was more than 460 for the mutant or wild-type cells. From the 55th minute behind five gradient temperature cycles, samples were taken every 5 minutes, totaling four times. At each time point, no less than 100 cells were counted. The topmost part of the diagram shows a diagram of the cell development model during vegetative growth of *T. thermophila*. (B) Vegetative growth curves of wild-type cells and *MSH6<sup>Tt</sup>KO* mutant cells at 30°C for 48 h. The starting cell concentration was  $0.125 \times 10^5$  cells/mL. a, Vegetative growth of *MSH6<sup>Tt</sup>KO* cells versus wild-type cells within 48 h after and before treatment with 0.9 mM MMS. b, c, Vegetative growth of *MSH6<sup>Tt</sup>KO* cells versus wild-type cells within 48 h after treatment with 0.9 mM DDP (b) and 4.5 mM DDP (c).

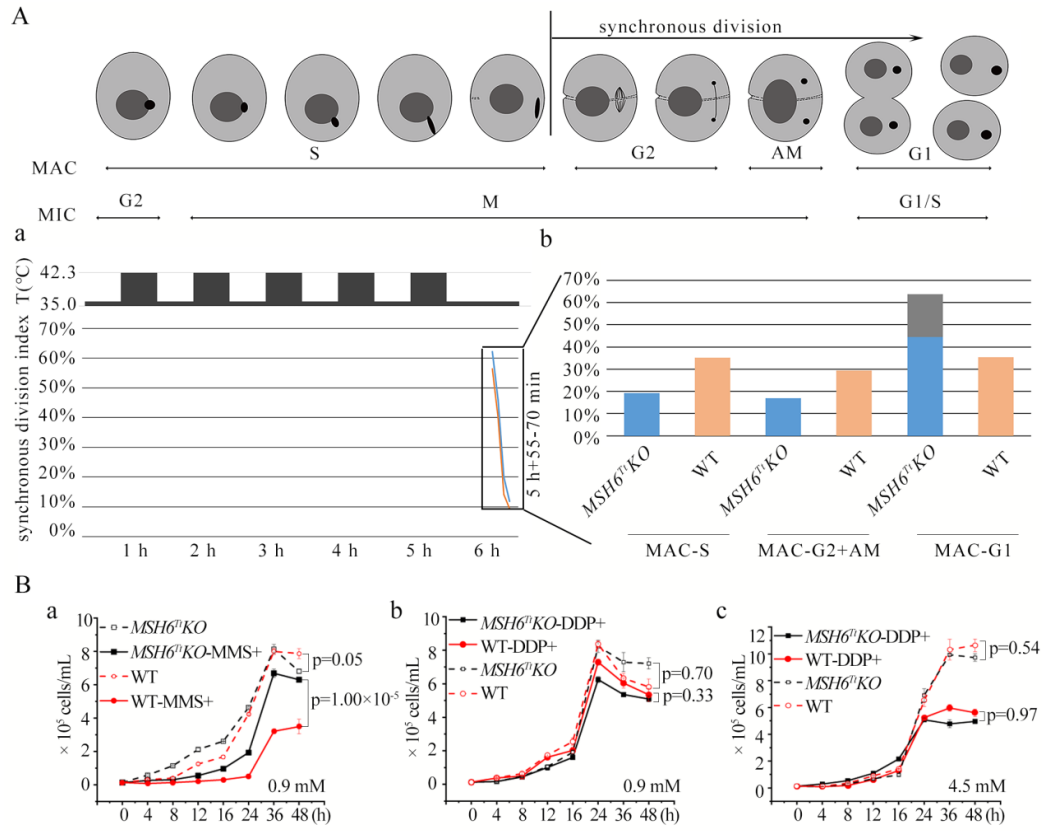

Figure S4. Knocking out *MSH6<sup>Tt</sup>* hinders the meiosis of MICs and the selection of gamete nuclei during the conjugation of *Tetrahymena*. The statistics of nuclear division of *MSH6<sup>Tt</sup>KO* mutants and wild-type cells during conjugation. The number of cells counted was more than 200 for each time point and each cell line. The topmost part of the diagram shows a diagram of the cell development model and abnormal single cells during the conjugation of wild-type cells in *T. thermophila*.

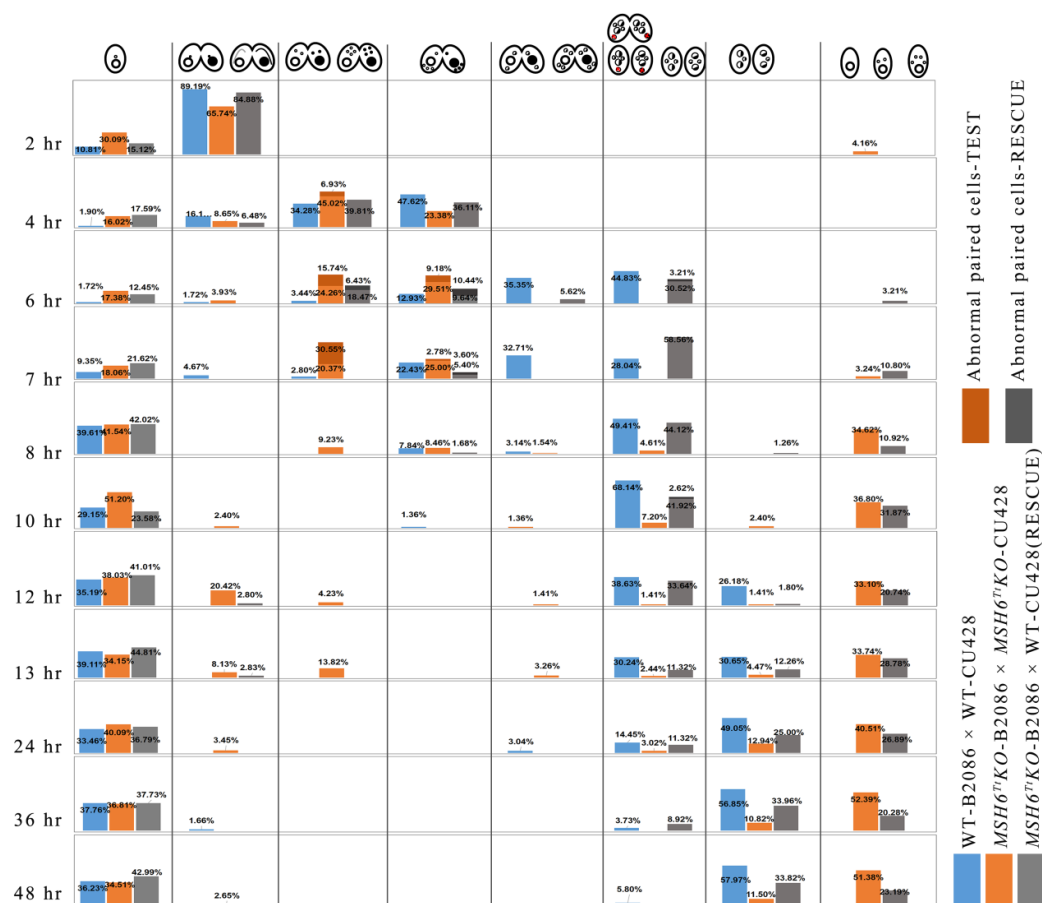

Figure S5. Western blots for the immunoprecipitation experiment. (A) Western blots for the IP experiment at 3 h of conjugation. (B) Western blots for the IP experiment at 8 h of conjugation. "IP: Anti-HA" indicates immunoprecipitation of HA-tagged proteins from whole cell lysates using anti-HA antibodies; IB: immunoprecipitation-blotting. The IB was probed with the indicated antibodies. Input: whole cell lysates before the IP experiment. WT: Untagged wild type cells; Msh6<sup>Tt</sup>-3HA: Cells prepared from two different mating types *Tetrahymena* cells expressing Msh6<sup>Tt</sup>-3HA.

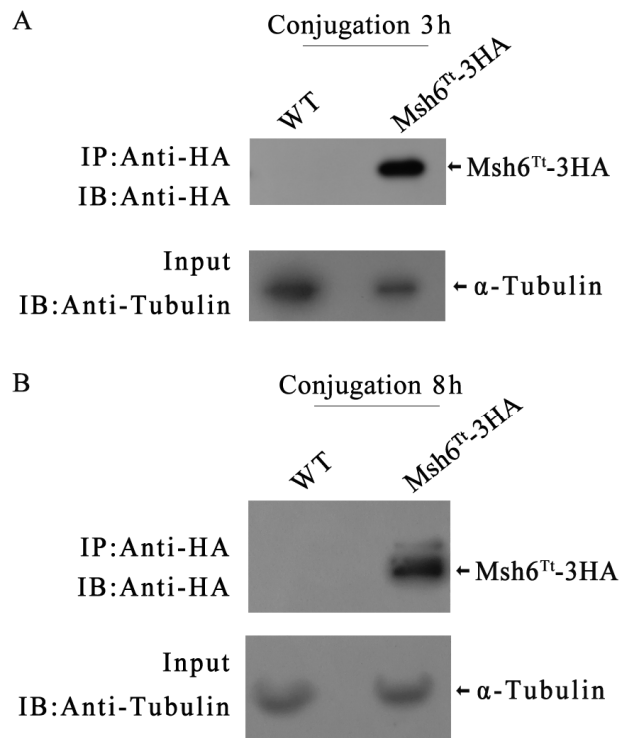

Table S1 Primer sequences used in the study.

| Primer name                 | Primer sequences                                                      |
|-----------------------------|-----------------------------------------------------------------------|
| <i>MSH6</i> -3HA-5F         | GAGCTCTTAGCTTAAATTGGATGTTATGTACCTG                                    |
| <i>MSH6</i> -3HA-5R         | GCGGCCGCTAAAAGTTAACTTTATTAAATTATTC<br>AATAATT                         |
| <i>MSH6</i> -3HA-3F         | CTCGAGTAAATAATAATAGAAATATATAATAGAC<br>GCT                             |
| <i>MSH6</i> -3HA-3R         | GGTACCTTATTGCTCTGTAATCAATTCGTAACT                                     |
| <i>MSH6</i> -3HA-Identify-F | ACATGGCATGTCATGTTGATGAGAAGAG                                          |
| <i>MSH6</i> -3HA-Identify-R | ATTCTTATTCACCTTATGATTTTATATTTG<br>CTAGAACTAGTGGATCCTCAATCATCGAATATCAT |
| <i>MSH6KO</i> -5F           | AAGCTTTAGTG                                                           |
| <i>MSH6KO</i> -5R           | GGTACCCGGGGGATCCAAATTATTATTGTACTAAT<br>CAATATATATG                    |
| <i>MSH6KO</i> -3F           | CGATACCGTCGACCTCGACATGTCATGTTGATGAG<br>AAGAGAAGT                      |
| <i>MSH6KO</i> -3R           | CCGGGCCCCCCTCGAGAACAATGAAAGGTAGTC<br>AGTCATCTC                        |
| <i>MSH6KO</i> -Identify-F   | TGCGTCTCTGAATATCACTAAATATT                                            |
| <i>MSH6KO</i> -Identify-R   | ATCTCTATCATATTCTTAGATTGCTTTC                                          |
| <i>msh2i</i> -iden-F        | GACATTAATGTGAAAGAAAAGGATAAG                                           |
| <i>msh2i</i> -iden-R        | TAGACAGTTATAAATCACCTACAATAC                                           |
| <i>msh6i</i> -iden-F        | AAAGAATTGCGTGAACCTCATAGCTG                                            |
| <i>msh6i</i> -iden-R        | CAAGAATATTAATTAAGGTATCCCATG                                           |
| q <i>MSH6L3</i> -F          | CATTAATGCTTGGACTAAGCTACTTG                                            |
| q <i>MSH6L3</i> -R          | CAATAAAAGACATCAAAGACCCTTCA                                            |
| q <i>MSH3</i> -F            | TCACGATCCTAAGTATCTCCTTGTT                                             |
| q <i>MSH3</i> -R            | CCTGGATCATAAACTATTTCTTAAGGT                                           |
| q <i>MSH3L1</i> -F          | GATAGAACATGTACAAAGCCAGGAG                                             |
| q <i>MSH3L1</i> -R          | CTTCGAAATAAACGCCTCTGCTCTT                                             |
| 17S-F                       | CCTGGGAAGGTACGGGTAAT                                                  |
| 17S-R                       | AAGGTTCAACCAGACCATTTCG                                                |

Table S2. qPCR data of relative expression profiles of *MSH6*<sup>Tt</sup> at different development stages.

| Target                 | Sample | Expression | Expression SEM | Corrected Expression SEM | Mean Cq | Cq SEM  |
|------------------------|--------|------------|----------------|--------------------------|---------|---------|
| <i>msh6i</i> -iden-F/R | Li     | 6.43219    | 1.07369        | 1.07369                  | 35.49   | 0.09309 |
|                        | Lm     | 34.26583   | 4.00279        | 4.00279                  | 32.76   | 0.16852 |
|                        | Lh     | 48.40626   | 7.15288        | 7.15288                  | 33.28   | 0.20583 |
|                        | S0     | 44.147     | 6.22277        | 6.22277                  | 33.91   | 0.20232 |
|                        | S6     | 1          | 0.32648        | 0.32648                  | 38.69   | 0.46421 |
|                        | S12    | 7.45853    | 2.56155        | 2.56155                  | 38.89   | 0.49538 |
|                        | S24    | 0.6666     | 0.04631        | 0.04631                  | 38.38   | 0.09122 |
|                        | C0     | 7.88996    | 1.83547        | 1.83547                  | 37.25   | 0.33154 |
|                        | C2     | 4003.24516 | 249.8862       | 249.8862                 | 28.65   | 0.08979 |
|                        | C4     | 222.05318  | 21.03993       | 21.03993                 | 31.04   | 0.10715 |
|                        | C6     | 59.76434   | 10.46359       | 10.46359                 | 32.3    | 0.24167 |
|                        | C8     | 13.83002   | 1.97758        | 1.97758                  | 34.32   | 0.20165 |
|                        | C10    | 8.46318    | 2.57579        | 2.57579                  | 35.11   | 0.29422 |
|                        | C12    | 59.46812   | 19.5284        | 19.5284                  | 32.54   | 0.47321 |
|                        | C16    | 76.57617   | 10.79179       | 10.79179                 | 33      | 0.20307 |
|                        | C18    | 29.12      | 1.21301        | 1.21301                  | 34.12   | 0.00165 |



Table S3. qPCR data of the relative expression levels of *MSH6<sup>Tt</sup>* in wild-type cells and *MSH6<sup>Tt</sup>KO* mutants at different growth stages.

| Target                 | Sample                           | Expression | Expression SEM | Corrected Expression SEM | Mean Cq | Cq SEM  |
|------------------------|----------------------------------|------------|----------------|--------------------------|---------|---------|
| <i>msh6i</i> -iden-F/R | WT-L                             | 1          | 0.20813        | 0.20813                  | 32.44   | 0.23033 |
|                        | WT-C-2                           | 208.04262  | 31.87504       | 31.87504                 | 26.04   | 0.21996 |
|                        | WT-C-8                           | 20.87025   | 2.40468        | 2.40468                  | 29.66   | 0.11998 |
|                        | WT-C-16                          | 2.07601    | 0.26856        | 0.26856                  | 33.01   | 0.17213 |
|                        | <i>MSH6<sup>Tt</sup>KO</i> -L    | N/A        | N/A            | N/A                      | N/A     | N/A     |
|                        | <i>MSH6<sup>Tt</sup>KO</i> -C-2  | N/A        | N/A            | N/A                      | N/A     | N/A     |
|                        | <i>MSH6<sup>Tt</sup>KO</i> -C-8  | 0.96593    | 0.17312        | 0.17312                  | 33.85   | 0.23613 |
|                        | <i>MSH6<sup>Tt</sup>KO</i> -C-16 | 0.18405    | 0.03173        | 0.03173                  | 36.58   | 0.24496 |

Table S4. qPCR data of the relative expression levels of *MSH2<sup>Tt</sup>* and *MSH6<sup>Tt</sup>* in the *msh2i* and WT mating pairs.

| Target                 | Sample             | Expression | Expression SEM | Corrected Expression SEM | Mean Cq | Cq SEM  |
|------------------------|--------------------|------------|----------------|--------------------------|---------|---------|
| <i>msh2i</i> -iden-F/R | Cd <sup>2+</sup> - | 1          | 0.27787        | 0.27787                  | 31.24   | 0.382   |
|                        | Cd <sup>2+</sup> + | 0.41289    | 0.09846        | 0.09846                  | 31.94   | 0.31656 |
| <i>msh6i</i> -iden-F/R | Cd <sup>2+</sup> - | 1          | 0.11089        | 0.11089                  | 32.41   | 0.10398 |
|                        | Cd <sup>2+</sup> + | 18.63234   | 3.62378        | 3.62378                  | 24.78   | 0.11578 |

Table S5. qPCR data of the expression levels of *MSH2<sup>Tt</sup>*, *MSH6L3<sup>Tt</sup>*, *MSH3<sup>Tt</sup>*, and *MSH3L1<sup>Tt</sup>* at different growth stages of *Tetrahymena* in wild-type cells and *MSH6<sup>Tt</sup>KO* mutant cell lines.

| Target                 | Sample                          | Expression | Expression SEM | Corrected Expression SEM | Mean Cq | Cq SEM  |
|------------------------|---------------------------------|------------|----------------|--------------------------|---------|---------|
| <i>msh2i</i> -iden-F/R | WT-L                            | 24.12896   | 0.00202        | 0.00202                  | 34.89   | 0.10757 |
|                        | <i>MSH6<sup>Tt</sup>KO</i> -L   | 4.91839    | 0.00053        | 0.00053                  | 36.34   | 0.12516 |
|                        | WT-S                            | 2.7261     | 0.00022        | 0.00022                  | 38.01   | 0.17734 |
|                        | <i>MSH6<sup>Tt</sup>KO</i> -S   | 1          | 0.00008        | 0.00008                  | 39.02   | 0.20869 |
|                        | WT-C-2                          | 5876.53927 | 0.39163        | 0.39163                  | 28.41   | 0.17607 |
|                        | <i>MSH6<sup>Tt</sup>KO</i> -C-2 | 3434.43942 | 0.31028        | 0.31028                  | 28.56   | 0.22881 |
|                        | WT-C-8                          | 192.42821  | 0.02891        | 0.02891                  | 33.45   | 0.39628 |
|                        | <i>MSH6<sup>Tt</sup>KO</i> -C-8 | 158.03196  | 0.01794        | 0.01794                  | 33.72   | 0.30076 |
| q <i>MSH6L3</i> -F/R   | WT-L                            | 17.83801   | 0.06735        | 0.06735                  | 32.76   | 0.17091 |
|                        | <i>MSH6<sup>Tt</sup>KO</i> -L   | 10.10324   | 0.01782        | 0.01782                  | 33.13   | 0.0418  |
|                        | WT-S                            | 1          | 0.00663        | 0.00663                  | 36.86   | 0.20713 |
|                        | <i>MSH6<sup>Tt</sup>KO</i> -S   | 3.56659    | 0.01532        | 0.01532                  | 34.24   | 0.50909 |
|                        | WT-C-2                          | 166.90419  | 0.73118        | 0.73118                  | 30.73   | 0.11681 |
|                        | <i>MSH6<sup>Tt</sup>KO</i> -C-2 | 249.9744   | 0.56374        | 0.56374                  | 29.87   | 0.22676 |
|                        | WT-C-8                          | 33.89328   | 0.14057        | 0.14057                  | 33.21   | 0.26051 |
|                        | <i>MSH6<sup>Tt</sup>KO</i> -C-8 | 46.73786   | 0.10597        | 0.10597                  | 32.68   | 0.15283 |
| q <i>MSH3</i> -F/R     | WT-L                            | 1          | 0.08282        | 0.08282                  | 29.21   | 0.11223 |
|                        | <i>MSH6<sup>Tt</sup>KO</i> -L   | 0.92389    | 0.13912        | 0.13912                  | 31.23   | 0.18214 |
|                        | WT-S                            | 0.12631    | 0.0328         | 0.0328                   | 34.68   | 0.3239  |
|                        | <i>MSH6<sup>Tt</sup>KO</i> -S   | 0.17425    | 0.01758        | 0.01758                  | 33.89   | 0.06055 |
|                        | WT-C-2                          | 18.00177   | 1.64022        | 1.64022                  | 29.07   | 0.10291 |
|                        | <i>MSH6<sup>Tt</sup>KO</i> -C-2 | 23.94342   | 1.2691         | 1.2691                   | 28.16   | 0.03826 |
|                        | WT-C-8                          | 0.12596    | 0.0129         | 0.0129                   | 31.59   | 0.12865 |
|                        | <i>MSH6<sup>Tt</sup>KO</i> -C-8 | 0.80614    | 0.05561        | 0.05561                  | 29.12   | 0.04687 |
| q <i>MSH3L1</i> -F/R   | WT-L                            | 8.06583    | 0.01208        | 0.01208                  | 35.45   | 0.15687 |
|                        | <i>MSH6<sup>Tt</sup>KO</i> -L   | 1.7261     | 0.00338        | 0.00338                  | 36.83   | 0.20001 |
|                        | WT-S                            | 1          | 0.00217        | 0.00217                  | 38.44   | 0.33835 |
|                        | <i>MSH6<sup>Tt</sup>KO</i> -S   | 5.2964     | 0.00857        | 0.00857                  | 35.6    | 0.27023 |
|                        | WT-C-2                          | 368.65086  | 0.33641        | 0.33641                  | 31.39   | 0.15078 |
|                        | <i>MSH6<sup>Tt</sup>KO</i> -C-2 | 162.57124  | 0.10187        | 0.10187                  | 31.94   | 0.07318 |
|                        | WT-C-8                          | 145.78738  | 0.1633         | 0.1633                   | 32.84   | 0.17836 |
|                        | <i>MSH6<sup>Tt</sup>KO</i> -C-8 | 37.48674   | 0.25864        | 0.25864                  | 34.77   | 1.15305 |
